# Supplementary material
Source: PubMed Central journal article supplement (PMC4863569)

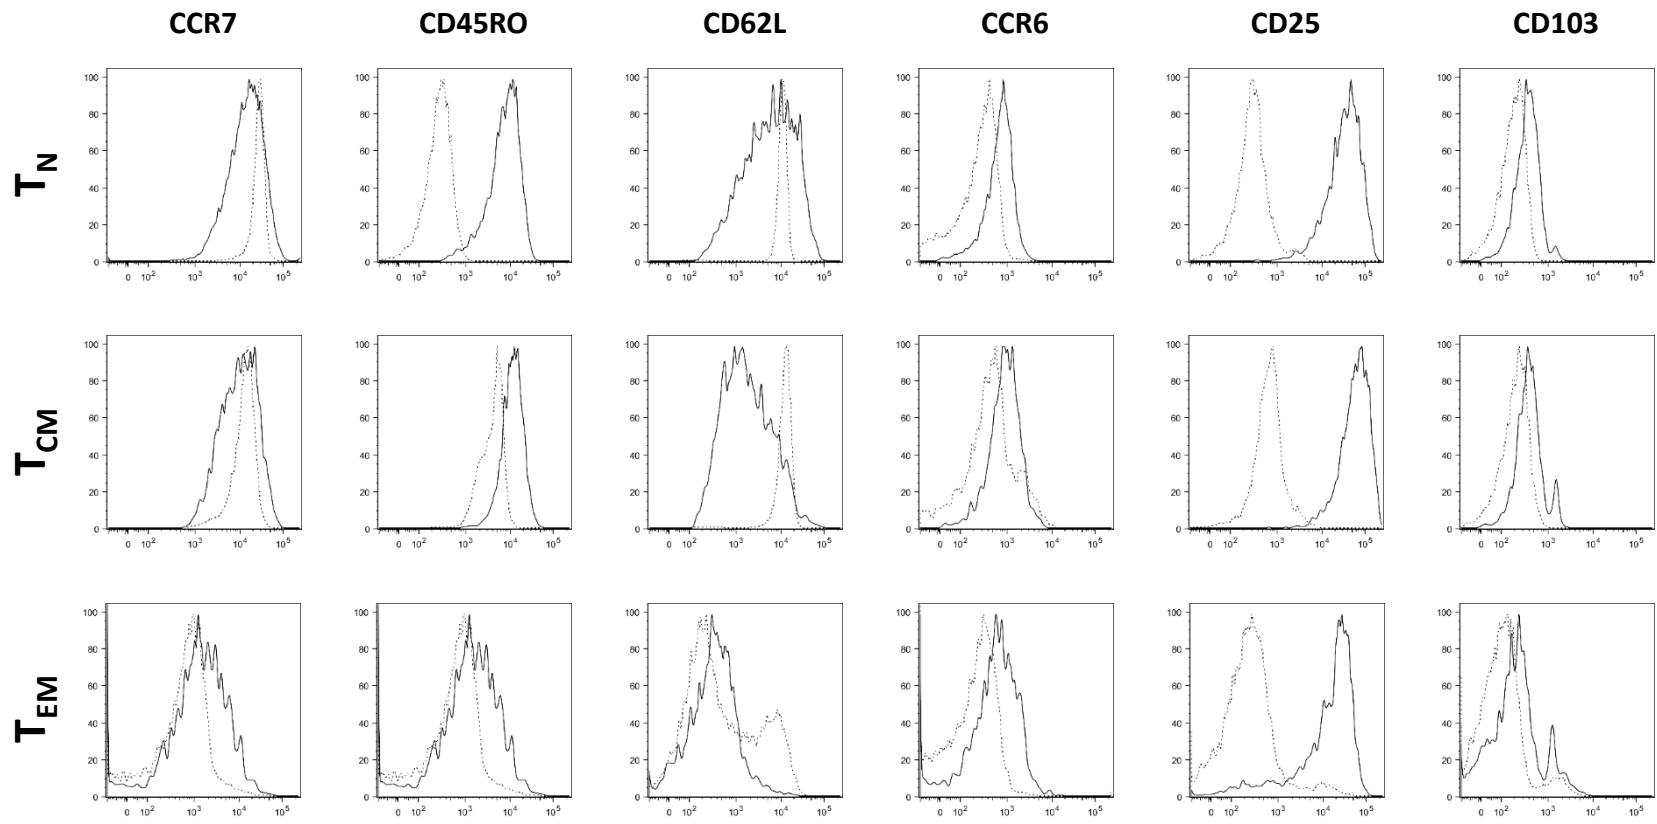

|          |  | CCR7  |       | CD45RO |       | CD62L |       | CCR6 |      | CD25 |       | CD103 |     |
|----------|--|-------|-------|--------|-------|-------|-------|------|------|------|-------|-------|-----|
|          |  | W/S   | S     | W/S    | S     | W/S   | S     | W/S  | S    | W/S  | S     | W/S   | S   |
| $T_N$    |  | 30554 | 18994 | 450    | 9557  | 11704 | 11000 | 311  | 832  | 433  | 46345 | 204   | 410 |
| $T_{CM}$ |  | 14680 | 15866 | 5139   | 13567 | 13792 | 4025  | 1182 | 1153 | 890  | 76422 | 237   | 462 |
| $T_{EM}$ |  | 685   | 3066  | 406    | 1606  | 2549  | 692   | 746  | 955  | 942  | 23399 | 219   | 451 |

Supplement: IMM-148-206-s003.pdf [file IMM-148-206-s003.pdf]
